# Supplementary material
Source: ML conference proceedings conference paper supplement (https://proceedings.mlr.press/v48/wu16.html)
Supplement: Supplementary file 1 [file wu16-supp.zip]

## SUPPLEMENTARY MATERIAL

## A. Proof of Theorem 2

**Theorem 2.** *In any stochastic environment where the arms have expected rewards  $\mu_i \in [0, 1]$  with 1-subgaussian noise, Algorithm 1 satisfies the following with probability at least  $1 - \delta$  and for every time horizon  $n$ , when  $\psi^\delta$  is chosen in accordance with Remark 1 and with  $L = \psi^\delta(n)$ :*

$$\sum_{s=1}^t \mu_{I_s} \geq (1 - \alpha)\mu_0 t \quad \text{for all } t \in \{1, \dots, n\}, \quad (5)$$

$$\tilde{R}_n \leq \sum_{i>0: \Delta_i > 0} \left( \frac{4L}{\Delta_i} + \Delta_i \right) + \frac{2(K+1)\Delta_0}{\alpha\mu_0} + \frac{6L}{\alpha\mu_0} \sum_{i=1}^K \frac{\Delta_0}{\max\{\Delta_i, \Delta_0 - \Delta_i\}}, \quad (10)$$

$$\tilde{R}_n \in O\left(\sqrt{nKL} + \frac{KL}{\alpha\mu_0}\right). \quad (11)$$

*Proof.* By Remark 1, with probability  $\mathbb{P}\{F\} \geq 1 - \delta$  the confidence intervals are valid for all  $t$  and all arms  $i \in \{1, \dots, K\}$ :

$$\begin{aligned} |\hat{\mu}_i(t-1) - \mu_i| &\leq \sqrt{\psi^\delta(T_i(t-1))/T_i(t-1)} \\ &\leq \sqrt{L/T_i(t-1)}; \end{aligned}$$

we will henceforth assume that this is the case (i.e. that  $F$  holds). By the definition of the confidence intervals and by the construction of Algorithm 1 we immediately satisfy the constraint

$$\sum_{t=1}^n \mu_{I_t} \geq (1 - \alpha)n\mu_0 \quad \text{for all } n.$$

We now bound the regret. Let  $i > 0$  be the index of a sub-optimal arm and suppose  $I_t = i$ . Since the confidence intervals are valid,

$$\begin{aligned} \mu^* \leq \theta_i(t) &\leq \hat{\mu}_i(t-1) + \sqrt{L/T_i(t-1)} \\ &\leq \mu_i + 2\sqrt{L/T_i(t-1)}, \end{aligned}$$

which implies that arm  $i$  has not been chosen too often; in particular we obtain

$$T_i(n) \leq T_i(n-1) + 1 \leq \frac{4L}{\Delta_i^2} + 1. \quad (17)$$

and the regret satisfies

$$\tilde{R}_n = \sum_{i=0}^K T_i(n)\Delta_i \leq \sum_{i>0: \Delta_i > 0} \left( \frac{4L}{\Delta_i} + \Delta_i \right) + T_0(n)\Delta_0.$$

If  $\Delta_0 = 0$  then the theorem holds trivially; we therefore assume that  $\Delta_0 > 0$  and find an upper bound for  $T_0(n)$ .

Let  $\tau = \max\{t \leq n \mid I_t = 0\}$  be the last round in which the default arm is played. Since  $F$  holds and  $\theta_0(t) = \mu_0 < \mu^* < \max_i \theta_i(t)$ , it follows that  $J_t = 0$  is never the UCB

choice; the default arm was only played because  $\xi_\tau < 0$ :

$$\sum_{i=0}^K T_i(\tau-1)\lambda_i(\tau) + \lambda_{J_\tau}(\tau) - (1 - \alpha)\mu_0\tau < 0 \quad (18)$$

By dropping  $\lambda_{J_\tau}(\tau)$ , replacing  $\tau$  with  $\sum_{i=0}^K T_i(\tau-1) + 1$ , and rearranging the terms in (18), we get

$$\begin{aligned} &\alpha T_0(\tau-1)\mu_0 \\ &< (1 - \alpha)\mu_0 + \sum_{i=1}^K T_i(\tau-1)((1 - \alpha)\mu_0 - \lambda_i(\tau)) \\ &\leq (1 - \alpha)\mu_0 \\ &\quad + \sum_{i=1}^K T_i(\tau-1) \left( (1 - \alpha)\mu_0 - \mu_i + \sqrt{\frac{L}{T_i(\tau-1)}} \right) \\ &\leq 1 + \sum_{i=1}^K S_i. \end{aligned} \quad (19)$$

where  $a_i = (1 - \alpha)\mu_0 - \mu_i$  and

$$\begin{aligned} S_i &= T_i(\tau-1) \cdot \left( (1 - \alpha)\mu_0 - \mu_i + \sqrt{L/T_i(\tau-1)} \right) \\ &= a_i T_i(\tau-1) + \sqrt{L T_i(\tau-1)} \end{aligned}$$

is a bound on the decrease in  $\xi_t$  in the first  $\tau-1$  rounds due to choosing arm  $i$ . We will now bound  $S_i$  for each  $i > 0$ .

The first case is  $a_i \geq 0$ , i.e.  $\Delta_i \geq \Delta_0 + \alpha\mu_0$ . Then (17) gives  $T_i(\tau-1) \leq 4L/\Delta_i^2 + 1$  and we get

$$S_i \leq \frac{4La_i}{\Delta_i^2} + \frac{2L}{\Delta_i} + 2 \leq \frac{6L}{\Delta_i} + 2. \quad (20)$$

The other case is  $a_i < 0$ , i.e.  $\Delta_i < \Delta_0 + \alpha\mu_0$ . Then

$$S_i \leq \sqrt{L T_i(\tau-1)} \leq \frac{2L}{\Delta_i} + 1, \quad (21)$$

and by using  $ax^2 + bx \leq -b^2/4a$  for  $a < 0$  we have

$$S_i \leq -\frac{L}{4a_i} = \frac{L}{4(\Delta_0 + \alpha\mu_0 - \Delta_i)}. \quad (22)$$

Summarizing (20) to (22) gives

$$S_i \leq \frac{6L}{\max\{\Delta_i, \Delta_0 - \Delta_i\}} + 2.$$

Continuing from (19), we get

$$\begin{aligned} T_0(n) &= T_0(\tau-1) + 1 \\ &\leq \frac{2K+2}{\alpha\mu_0} + \frac{1}{\alpha\mu_0} \sum_{i=1}^K \frac{6L}{\max\{\Delta_i, \Delta_0 - \Delta_i\}}. \end{aligned}$$

We can now upper bound the regret by

$$\begin{aligned} \tilde{R}_n \leq & \sum_{i>0:\Delta_i>0} \left( \frac{4L}{\Delta_i} + \Delta_i \right) + \frac{2(K+1)\Delta_0}{\alpha\mu_0} \\ & + \frac{6L}{\alpha\mu_0} \sum_{i=1}^K \frac{\Delta_0}{\max\{\Delta_i, \Delta_0 - \Delta_i\}}. \end{aligned} \quad (10)$$

We will now show (11). To bound the regret due to the non-default arms, Jensen's inequality gives

$$\left( \sum_{i>0} T_i(n) \Delta_i \right)^2 \leq m^2 \sum_{i>0} \frac{T_i(n)}{m} \Delta_i^2,$$

where  $m \leq n$  is the number of times non-default arms were chosen. Combining this with  $\Delta_i^2 \leq 4L/T_i(n)$  for sub-optimal arms from (17) gives

$$\sum_{i>0} T_i(n) \Delta_i \leq 2\sqrt{mKL} \in O(\sqrt{nKL}).$$

To bound the regret due to the default arm, observe that  $\max\{\Delta_i, \Delta_0 - \Delta_i\} \geq \Delta_0/2$  and thus  $T_0(n)\Delta_0 \in O(KL/\alpha\mu_0)$ . Combining these two bounds gives (11).  $\square$

## B. Proof of Theorem 5

**Theorem 5.** *Algorithm 1, modified as above to work without knowing  $\mu_0$  but otherwise the same conditions as Theorem 2, satisfies with probability  $1 - \delta$  and for all time horizons  $n$  the constraint (5) and the regret bound*

$$\begin{aligned} \tilde{R}_n \leq & \sum_{i:\Delta_i>0} \left( \frac{4L}{\Delta_i} + \Delta_i \right) + \frac{2(K+1)\Delta_0}{\alpha\mu_0} \\ & + \frac{7L}{\alpha\mu_0} \sum_{i=1}^K \frac{\Delta_0}{\max\{\Delta_i, \Delta_0 - \Delta_i\}}. \end{aligned} \quad (15)$$

*Proof.* We proceed very similarly to the proof of Theorem 2 in Appendix A. As we did there, we assume that  $F$  holds: the confidence intervals are valid for all rounds and all arms (including the default), which happens with probability  $\mathbb{P}\{F\} \geq 1 - \delta$ .

To show that the modified algorithm satisfies the constraint (5), we write the budget (6) as

$$\tilde{Z}_t = \sum_{i=1}^K T_i(t-1)\mu_i + \mu_{J_t} + (T_0(t-1) - (1-\alpha)t)\mu_0$$

when the UCB arm  $J_t$  is chosen and show that it is indeed lower-bounded by

$$\begin{aligned} \xi'_t = & \sum_{i=1}^K T_i(t-1)\lambda_i(t) + \lambda_{J_t}(t) \\ & + (T_0(t-1) - (1-\alpha)t)\theta_0(t). \end{aligned} \quad (14)$$

This is apparent if  $T_0(t-1) < (1-\alpha)t$ , since the last term in (14) is then negative and  $\theta_0(t) \geq \mu_0$ . On the other hand, if  $T_0(t-1) \geq (1-\alpha)t$  then the constraint is still satisfied:

$$\sum_{s=1}^t \mu_{I_s} \geq T_0(t-1)\mu_0 \geq (1-\alpha)\mu_0 t.$$

We now upper-bound the regret. As in the earlier proof, we can show that for any arm  $i > 0$  with  $\Delta_i > 0$  we have  $T_i(n) \leq 4L/\Delta_i^2 + 1$ . If this also holds for  $i = 0$  or if  $\Delta_0 = 0$  then  $\tilde{R}_n \leq \sum_{i:\Delta_i>0} (4L/\Delta_i + \Delta_i)$  and the theorem holds trivially. From now on we only consider the case when  $\Delta_0 > 0$  and  $T_0(n) > 4L/\Delta_0^2 + 1$ . As before, we will proceed to upper-bound  $T_0(n)$ .

Let  $\tau$  be the last round in which  $I_\tau = 0$ . We can ignore the possibility that  $J_\tau = 0$ , since then the above bound on  $T_i(n)$  would apply even to the default arm, contradicting our assumption above. Thus we can assume that the default arm was played because  $\xi'_\tau < 0$ :

$$\begin{aligned} & \sum_{i=1}^K T_i(\tau-1)\lambda_i(\tau) + \lambda_{J_\tau}(\tau) \\ & + (T_0(\tau-1) - (1-\alpha)\tau)\theta_0(\tau) < 0, \end{aligned}$$

in which we drop  $\lambda_{J_\tau}(\tau)$ , replace  $\tau$  with  $\sum_{i=0}^K T_i(\tau-1) + 1$ , and rearrange the terms to get

$$\begin{aligned} & \alpha T_0(\tau-1)\theta_0(\tau) < (1-\alpha)\theta_0(\tau) \\ & + \sum_{i=1}^K T_i(\tau-1)((1-\alpha)\theta_0(\tau) - \lambda_i(\tau)). \end{aligned} \quad (23)$$

We lower-bound the left-hand side of (23) using  $\theta_0(\tau) \geq \mu_0$ , whereas we upper-bound the right-hand side using

$$\theta_0(\tau) \leq \mu_0 + \sqrt{\frac{L}{T_0(\tau-1)}} \leq \mu_0 + \frac{\Delta_0}{2},$$

which comes from  $T_0(\tau-1) \geq 4L/\Delta_0^2$ . Combining these in (23) with the lower confidence bound  $\lambda_i(\tau) \geq \mu_i - \sqrt{L/T_i(\tau-1)}$  gives

$$\begin{aligned} \alpha\mu_0 T_0(\tau-1) & < (1-\alpha) \left( \mu_0 + \frac{\Delta_0}{2} \right) \\ & + \sum_{i=1}^K T_i(\tau-1) \left( (1-\alpha) \left( \mu_0 + \frac{\Delta_0}{2} \right) \right. \\ & \quad \left. - \mu_i + \sqrt{\frac{L}{T_i(\tau-1)}} \right) \\ & = (1-\alpha) \left( \mu_0 + \frac{\Delta_0}{2} \right) + \sum_{i=1}^K S_i \\ & \leq 1 + \sum_{i=1}^K S_i, \end{aligned} \quad (24)$$

where  $a_i = (1 - \alpha)(\mu_0 + \Delta_0/2) - \mu_i$  and

$$S_i = a_i T_i(\tau - 1) + \sqrt{L T_i(\tau - 1)}$$

is a bound on the decrease in  $\xi'_t$  in the first  $\tau - 1$  rounds due to choosing arm  $i$ . We will now bound  $S_i$  for each  $i > 0$ .

Analogously to the previous proof, we get the bounds

$$S_i \leq \frac{6L}{\Delta_i} + 2, \quad \text{when } a_i \geq 0; \quad (25)$$

$$S_i \leq \frac{2L}{\Delta_i} + 1, \quad \text{otherwise}; \quad (26)$$

and in the latter case, using  $ax^2 + bx \leq -b^2/4a$  gives

$$S_i \leq -\frac{L}{4a_i} = \frac{L}{4((1 + \alpha)\Delta_0/2 + \alpha\mu_0 - \Delta_i)}. \quad (27)$$

Summarizing (25) to (27) gives

$$\begin{aligned} S_i &\leq \frac{6L}{\max\{\Delta_i, 24((1 + \alpha)\Delta_0/2 + \alpha\mu_0 - \Delta_i)\}} + 2 \\ &\leq \frac{7L}{\max\{\Delta_i, \Delta_0 - \Delta_i\}} + 2. \end{aligned}$$

Continuing with (24), if  $T_0(n) > \frac{4L}{\Delta_0^2} + 1$ , we get

$$\begin{aligned} T_0(n) &= T_0(\tau - 1) + 1 \\ &\leq \frac{2K + 2}{\alpha\mu_0} + \frac{1}{\alpha\mu_0} \sum_{i=1}^K \frac{7L}{\max\{\Delta_i, \Delta_0 - \Delta_i\}}. \end{aligned}$$

We can now upper bound the regret by

$$\begin{aligned} \tilde{R}_n &\leq \sum_{i:\Delta_i > 0} \left( \frac{4L}{\Delta_i} + \Delta_i \right) + \frac{2(K + 1)\Delta_0}{\alpha\mu_0} \\ &\quad + \frac{7L}{\alpha\mu_0} \sum_{i=1}^K \frac{\Delta_0}{\max\{\Delta_i, \Delta_0 - \Delta_i\}}. \quad (15) \quad \square \end{aligned}$$

### C. Proof of Theorem 7

**Theorem 7.** Any  $\hat{R}_t^\delta$ -admissible algorithm  $\mathcal{A}$ , when adapted with our safe-playing strategy, satisfies the constraint (2) and has a regret bound of  $R_n \leq t_0 + \hat{R}_n^\delta$  with probability at least  $1 - \delta$  where  $t_0 = \max\{t \mid \alpha\mu_0 t \leq \hat{R}_t^\delta + \mu_0\}$ .

*Proof of Theorem 7.* It is clear from the description of the safe-playing strategy that it is indeed safe: the constraint (2) is always satisfied.

The algorithm plays safe when the following quantity, which is a lower bound on the budget  $Z_t$ , is negative:

$$Z'_t = Z_t - X_{t,I_t} = \sum_{s=1}^{t-1} X_{s,I_s} - (1 - \alpha)\mu_0 t$$

To upper bound the regret, consider only the rounds in which our safe-playing strategy does not interfere with

playing  $\mathcal{A}$ 's choice of arm. Then with probability  $1 - \delta$ ,

$$\max_{i \in \{0, \dots, K\}} \sum_{s=1}^t \mathbb{1}\{Z'_s \geq 0\} (X_{s,i} - X_{s,I_s}) \leq \hat{R}_{B(t)}^\delta$$

where  $B(t) = \sum_{s=1}^t \mathbb{1}\{Z'_s \geq 0\}$ . Let  $\tau$  be the last round in which the algorithm plays safe.

$$\begin{aligned} &\mu_0 B(\tau - 1) \\ &\leq \max_i \sum_{s=1}^{\tau-1} \mathbb{1}\{Z'_s \geq 0\} X_{s,i} \\ &\leq \hat{R}_{B(\tau-1)}^\delta + \sum_{s=1}^{\tau-1} \mathbb{1}\{Z'_s \geq 0\} X_{s,I_s} \\ &= \hat{R}_{B(\tau-1)}^\delta + \sum_{s=1}^{\tau-1} X_{s,I_s} - \mu_0(\tau - 1 - B(\tau - 1)) \\ &\leq \hat{R}_{B(\tau-1)}^\delta + (1 - \alpha)\mu_0\tau - \mu_0(\tau - 1 - B(\tau - 1)), \end{aligned}$$

which indicates  $\alpha\mu_0\tau \leq \hat{R}_\tau^\delta + \mu_0$  and thus  $\tau \leq t_0$ . It follows that  $R_n \leq t_0 + \hat{R}_n^\delta$ .  $\square$

### D. Proof of Theorem 9

**Theorem 9.** Suppose for any  $\mu_i \in [0, 1]$  ( $i > 0$ ) and  $\mu_0$  satisfying

$$\min\{\mu_0, 1 - \mu_0\} \geq \max\left\{1/2\sqrt{\alpha}, \sqrt{e + 1/2}\right\} \sqrt{K/n},$$

an algorithm satisfies  $\mathbb{E}_\mu \sum_{t=1}^n X_{t,I_t} \geq (1 - \alpha)\mu_0 n$ . Then there is some  $\mu \in [0, 1]^K$  such that its expected regret satisfies  $\mathbb{E}_\mu R_n \geq B$  where

$$B = \max\left\{\frac{K}{(16e + 8)\alpha\mu_0}, \frac{\sqrt{Kn}}{\sqrt{16e + 8}}\right\}. \quad (16)$$

*Proof of Theorem 9.* Pick any algorithm. We want to show that the algorithm's regret on some environment is at least as large as  $B$ . If  $\mathbb{E}_\mu R_n > B$  for some  $\mu \in [0, 1]^K$ , there is nothing to be proven. Hence, without loss of generality, we can assume that the algorithm is *consistent* in the sense that  $\mathbb{E}_\mu R_n \leq B$  for all  $\mu \in [0, 1]^K$ .

For some  $\Delta > 0$ , define environment  $\mu \in \mathbb{R}^K$  such that  $\mu_i = \mu_0 - \Delta$  for all  $i \in [K]$ . For now, assume that  $\mu_0$  and  $\Delta$  are such that  $\mu_i \geq 0$ ; we will get back to this condition later. Also define environment  $\mu^{(i)}$  for each  $i = 1, \dots, K$  by

$$\mu_j^{(i)} = \begin{cases} \mu_0 + \Delta, & \text{for } j = i; \\ \mu_0 - \Delta, & \text{otherwise.} \end{cases}$$

In this proof, we use  $T_i = T_i(n)$  to denote the number of times arm  $i$  was chosen in the first  $n$  rounds. We distinguish two cases, based on how large the exploration budget is.

**Case 1:**  $\alpha \geq \frac{\sqrt{K}}{\mu_0 \sqrt{(16e+8)n}}$ .

In this case,  $B = \frac{\sqrt{Kn}}{\sqrt{16e+8}}$  and we use  $\Delta = (4e+2)B/n$ . For each  $i \in [K]$  define event  $A_i = \{T_i \leq 2B/\Delta\}$ . First we prove that  $\mathbb{P}_\mu(A_i) \geq 1/2$ :

$$\begin{aligned} \mathbb{P}_\mu\{T_i \leq 2B/\Delta\} &= 1 - \mathbb{P}_\mu\{T_i > 2B/\Delta\} \\ &\geq 1 - \frac{\Delta \mathbb{E}_\mu[T_i]}{2B} \\ &\geq 1 - \frac{\mathbb{E}_\mu[R_n]}{2B} \geq \frac{1}{2}. \end{aligned}$$

Next we prove that  $\mathbb{P}_{\mu^{(i)}}(A_i) \leq 1/4e$ :

$$\begin{aligned} \mathbb{P}_{\mu^{(i)}}\{T_i \leq 2B/\Delta\} &= \mathbb{P}_{\mu^{(i)}}\{n - T_i \geq n - 2B/\Delta\} \\ &\leq \frac{\mathbb{E}_{\mu^{(i)}}[n - T_i]}{n - 2B/\Delta} \\ &\leq \frac{B}{\Delta n - 2B} = \frac{1}{4e}. \end{aligned}$$

Note that  $\mu$  and  $\mu^{(i)}$  differ only in the  $i$ th component:  $\mu_i = \mu_0 - \Delta$  whereas  $\mu_i^{(i)} = \mu_0 + \Delta$ . Then the KL divergence between the reward distributions of the  $i$ th arms is  $\text{KL}(\mu_i, \mu_i^{(i)}) = (2\Delta)^2/2 = 2\Delta^2$ . Define the *binary relative entropy* to be

$$d(x, y) = x \log \frac{x}{y} + (1-x) \log \frac{1-x}{1-y};$$

it satisfies  $d(x, y) \geq (1/2) \log(1/4y)$  for  $x \in [1/2, 1]$  and  $y \in (0, 1)$ . By a standard change of measure argument (see, e.g., [Kaufmann et al., 2015](#), Lemma 1) we get that

$$\begin{aligned} \mathbb{E}_\mu[T_i] \cdot \text{KL}(\mu_i; \mu_i^{(i)}) &\geq d(\mathbb{P}_\mu(A_i), \mathbb{P}_{\mu^{(i)}}(A_i)) \\ &\geq \frac{1}{2} \log \frac{1}{4(1/4e)} = \frac{1}{2} \end{aligned}$$

and so  $\mathbb{E}_\mu[T_i] \geq 1/4\Delta^2$  for each  $i \in [K]$ . Hence

$$\mathbb{E}_\mu[R_n] = \Delta \sum_{i \in [K]} \mathbb{E}_\mu[T_i] \geq \frac{K}{4\Delta} = \frac{\sqrt{Kn}}{\sqrt{16e+8}} = B.$$

**Case 2:**  $\alpha < \frac{\sqrt{K}}{\mu_0 \sqrt{(16e+8)n}}$ .

In this case,  $B = \frac{K}{(16e+8)\alpha\mu_0}$  and we use  $\Delta = K/4\alpha\mu_0 n$ . For each  $i$  define the event  $A_i = \{T_i \leq 2\alpha\mu_0 n/\Delta\}$ . First we prove that  $\mathbb{P}_\mu(A_i) \geq 1/2$ :

$$\begin{aligned} \mathbb{P}_\mu\{T_i \leq 2\alpha\mu_0 n/\Delta\} &= 1 - \mathbb{P}_\mu\{T_i > 2\alpha\mu_0 n/\Delta\} \\ &\geq 1 - \frac{\Delta \mathbb{E}_\mu[T_i]}{2\alpha\mu_0 n} \\ &\geq 1 - \frac{\mathbb{E}_\mu[R_n]}{2\alpha\mu_0 n} \geq \frac{1}{2}, \end{aligned}$$

where we use the fact that

$$\begin{aligned} \mathbb{E}_\mu[R_n] &= n\mu_0 - \mathbb{E}_\mu\left[\sum_{t=1}^n X_{t, I_t}\right] \\ &\leq n\mu_0 - (1-\alpha)\mu_0 n = \alpha\mu_0 n. \end{aligned}$$

Next, we show that  $\mathbb{P}_{\mu^{(i)}}(A_i) < 1/4e$ :

$$\begin{aligned} \mathbb{P}_{\mu^{(i)}}\{T_i \leq 2\alpha\mu_0 n/\Delta\} &= \mathbb{P}_{\mu^{(i)}}\{n - T_i \geq n - 2\alpha\mu_0 n/\Delta\} \\ &\leq \frac{\mathbb{E}_{\mu^{(i)}}[n - T_i]}{n - 2\alpha\mu_0 n/\Delta} \\ &\leq \frac{B}{\Delta n - 2\alpha\mu_0 n} \\ &= \frac{K}{(4e+2)K - (32e+16)\alpha^2\mu_0^2 n} < \frac{1}{4e}. \end{aligned}$$

As in the other case, we have  $\mathbb{E}_\mu[T_i] > 1/4\Delta^2$  for each  $i \in [K]$ . Therefore

$$\mathbb{E}_\mu[R_n] = \Delta \sum_{i \in [K]} \mathbb{E}_\mu[T_i] > \frac{K}{4\Delta} = \alpha\mu_0 n,$$

which contradicts the fact that  $\mathbb{E}_\mu[R_n] \leq \alpha\mu_0 n$ . So there does not exist an algorithm whose worst-case regret is smaller than  $B$ .

To summarize, we proved that

$$\mathbb{E}_\mu R_n \geq \begin{cases} \frac{\sqrt{Kn}}{\sqrt{16e+8}}, & \text{when } \alpha \geq \frac{\sqrt{K}}{\mu_0 \sqrt{(16e+8)n}} \\ \frac{K}{(16e+8)\alpha\mu_0}, & \text{otherwise,} \end{cases}$$

finishing the proof.  $\square$
